# Supplementary material for: An enzyme-free and label-free assay for copper(ii) ion detection based on self-assembled DNA concatamers and Sybr Green I
Source: Royal Society of Chemistry journal article supplement (doi:10.1039/c3an00973d), 2013-01-01
Supplement: c3an00973d.pdf [file c3an00973d.pdf]

## Electronic Supplementary Information

### **An enzyme-free and label-free assay for copper (II) ion detection based on self-assembled DNA concatamers and Sybr Green I**

**Chenchen Ge,<sup>‡a,b</sup> Junhua Chen,<sup>‡a</sup> Wei Wu,<sup>a</sup> Zhiyuan Fang,<sup>a</sup> Lingbo Chen,<sup>a,c</sup> Qi Liu,<sup>a</sup>  
Lin Wang,<sup>a</sup> Xuerong Xing<sup>a</sup> and Lingwen Zeng<sup>\*a</sup>**

<sup>a</sup> *Key Laboratory of Regenerative Biology, South China Institute for Stem Cell Biology and Regenerative Medicine, Guangzhou Institutes of Biomedicine and Health, Chinese Academy of Sciences, Guangzhou 510530, China. Fax: +86 20 32015245; Tel: +86 20 32015312; E-mail: zeng6@yahoo.com*

<sup>b</sup> *School of Life Sciences, University of Science and Technology of China, Hefei, 230026, China.*

<sup>c</sup> *School of Life Sciences, Anhui University, Hefei 230601, P.R. China*

<sup>‡</sup>*Joint first authors: these two authors contribute equally to this work.*

| Samples     | Cu <sup>2+</sup> |          | Recovery (%) |
|-------------|------------------|----------|--------------|
|             | Added            | Detected |              |
| Tap water   | 1 μM             | 8.69 μM  | 86.9±12.76   |
|             | 10 nM            | 9.082 nM | 90.82±9.02   |
|             | 100 pM           | 104 pM   | 104±4.24     |
| Human serum | 1 μM             | 0.8 μM   | 80±13.58     |
|             | 10 nM            | 10.58 nM | 105.8±10.59  |
|             | 100 pM           | 96.29 pM | 96.29±6.75   |

**Table S1.** Recovery experiments for Cu<sup>2+</sup> detection in tap water and human serum samples.
